# Supplementary material for: Identification of Dual-Target Inhibitors for Epidermal Growth Factor Receptor and AKT: Virtual Screening Based on Structure and Molecular Dynamics Study
Source: MDPI journal article supplement (doi:10.3390/molecules28227607), 2023-11-15
Supplement: s1 [file s1]

## Supplementary Material

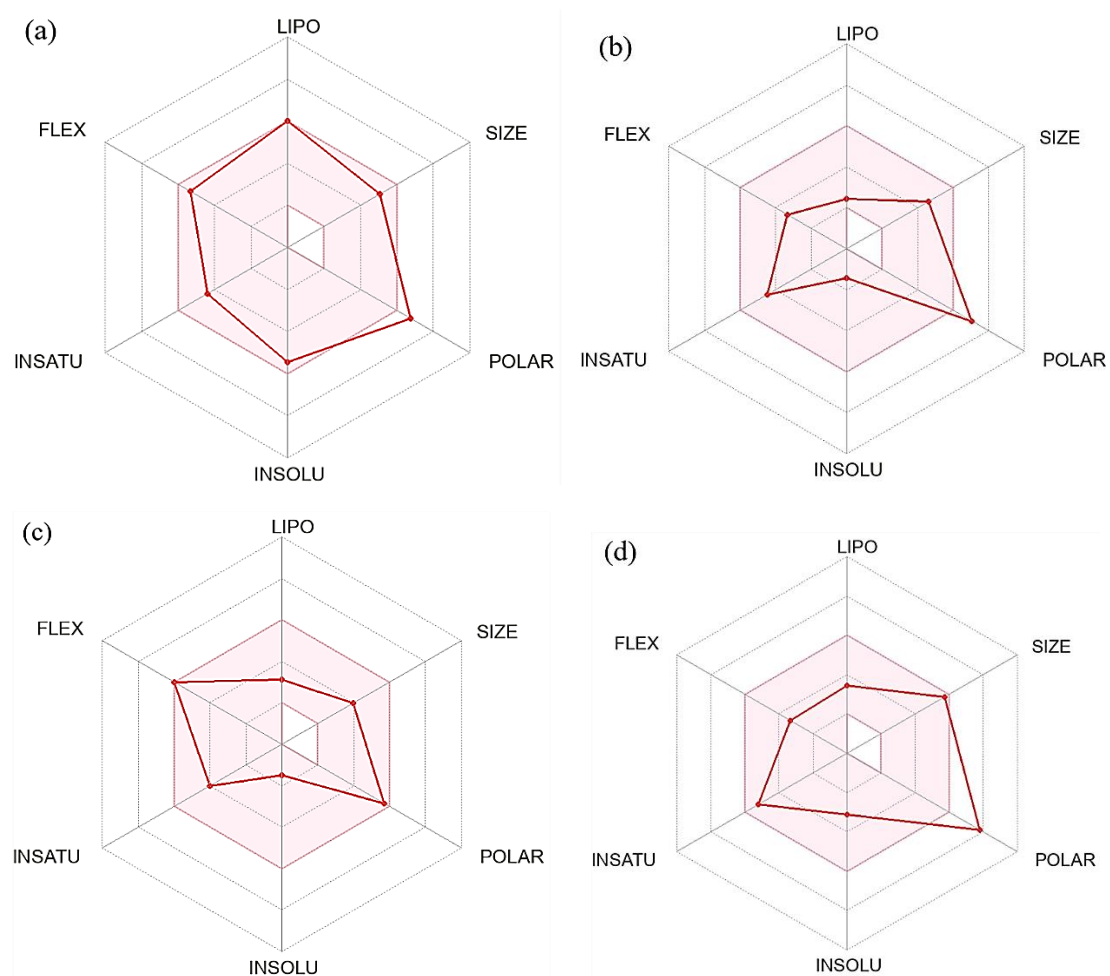

Figure S1. ADMET analyze of TCMIO5312, HMDB0012243, HMDB0014570, HMDB0037450.

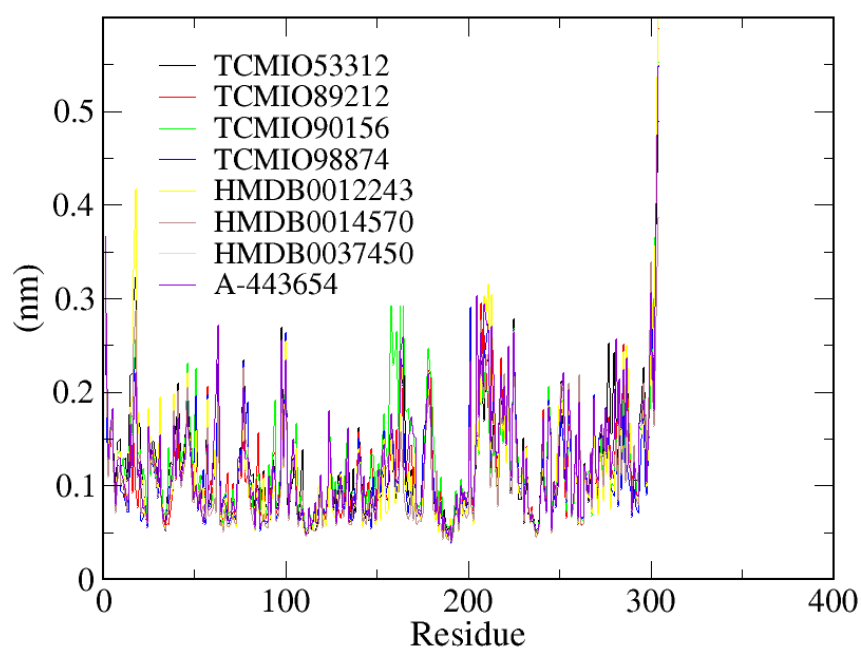

Figure S2. RMSF of AKT complexes:

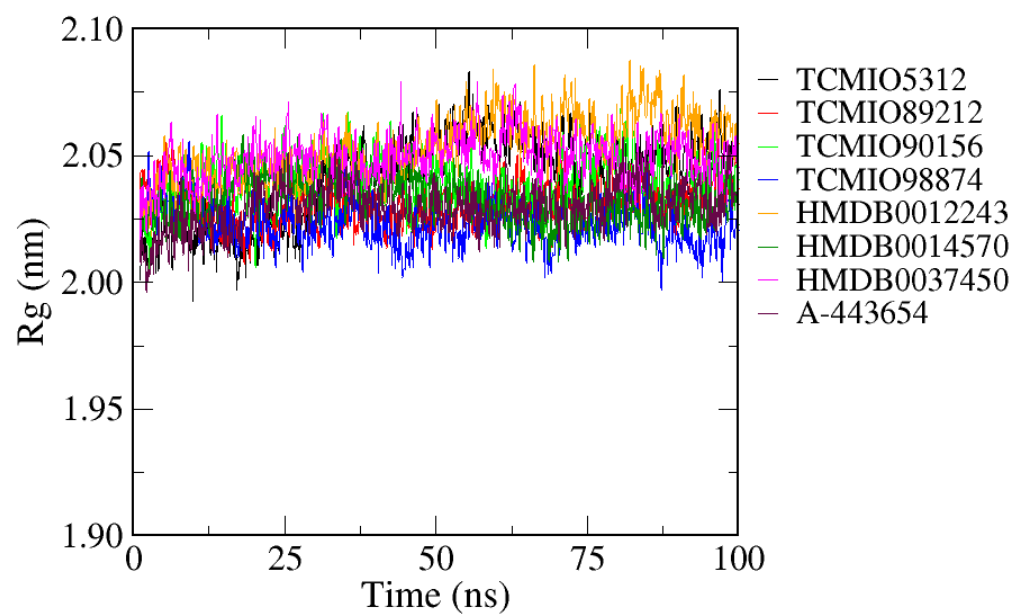

Figure S3. Rg of AKT complexes

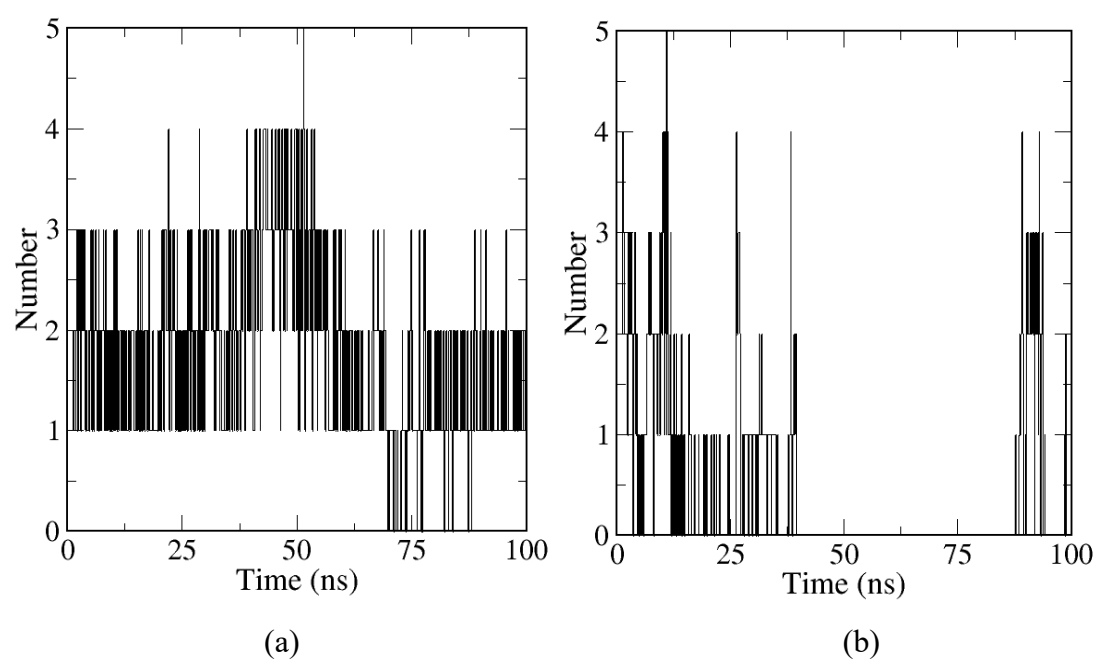

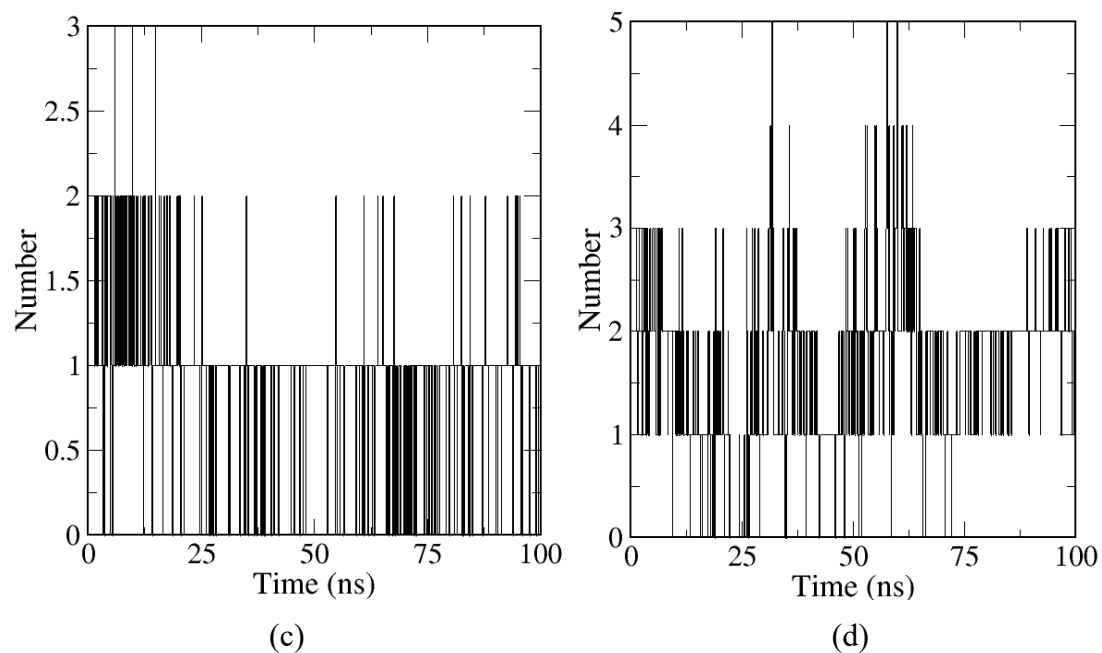

Figure S4. H-bond analyses of EGFR complexes (a) TCMIO5312, (b) HMDB0012243, (c) HMDB0037450, (d) HMDB0014570.

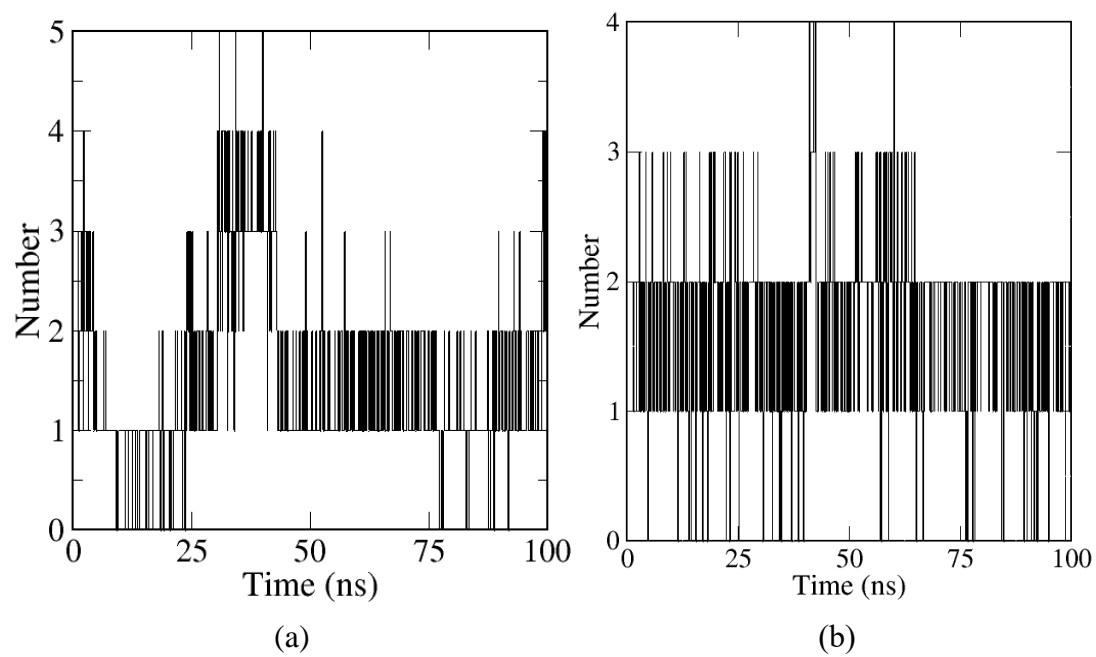

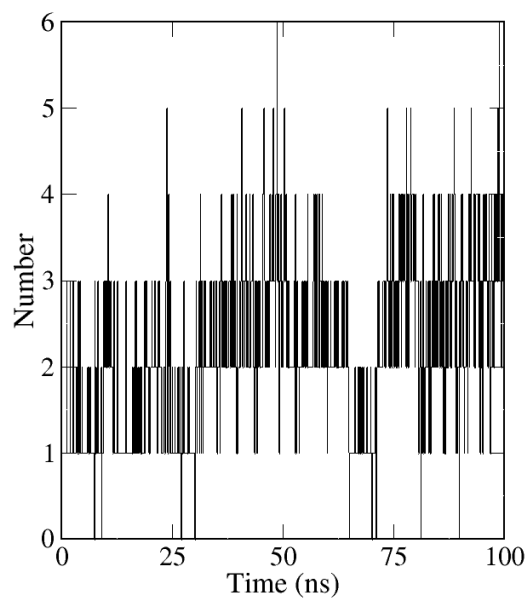

(c)

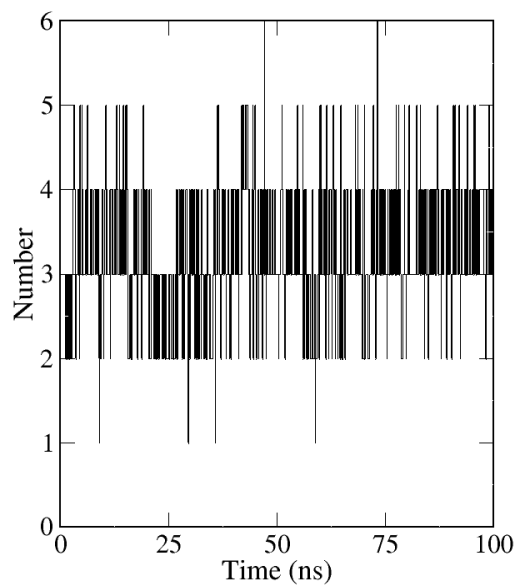

(d)

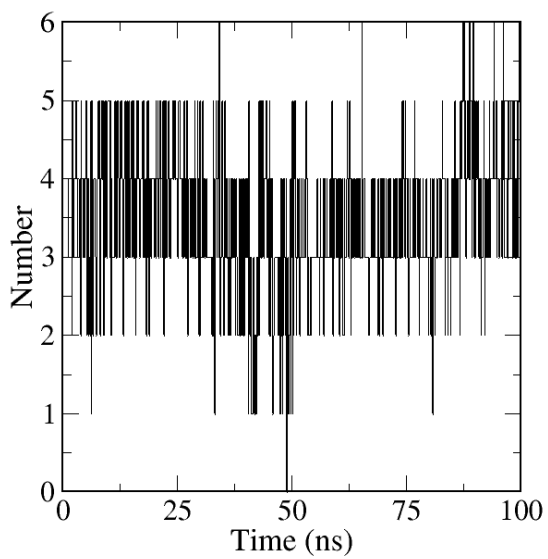

(e)

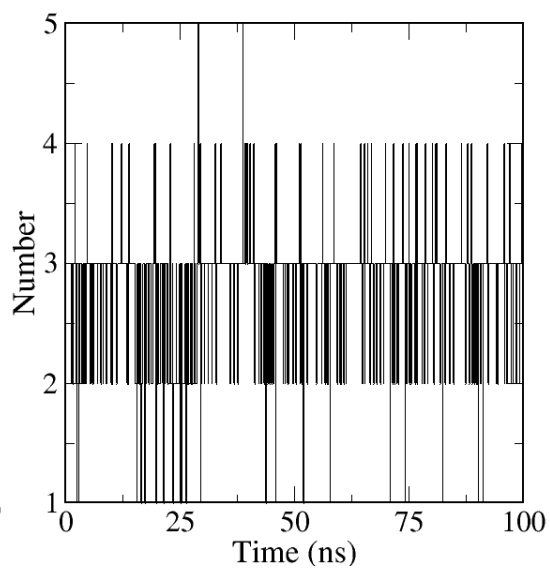

(f)

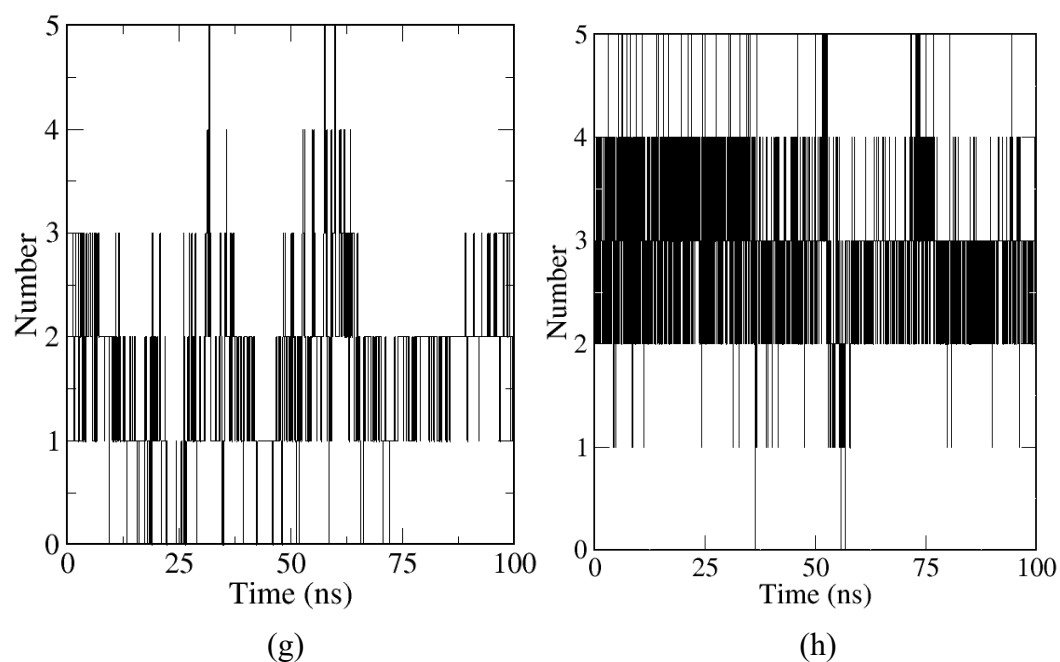

Figure S5. H-bond analyses of AKT complexes H-bond analyses of AKT complexes (a) TCMIO5312, (b) TCMIO89212, (c) TCMIO90156, (d) TCMIO98874, (e) HMDB0012243, (f) HMDB0037450, (g) HMDB0014570, (h) A-443654.

Table S1. The full list of the active ligands used

| num | mol       | Structure                                                                           | IC50(um) |
|-----|-----------|-------------------------------------------------------------------------------------|----------|
| 1   | 5328245   | 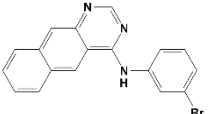 | 0.003    |
| 2   | 2857      |  | 0.006    |
| 3   | 122658923 |  | 0.007    |
| 4   | 4705      |  | 0.029    |
| 5   | 5328253   |  | 0.091    |

|    |           |                                                                                     |       |
|----|-----------|-------------------------------------------------------------------------------------|-------|
| 6  | 5328045   | 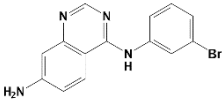   | 0.1   |
| 7  | 2426      |    | 0.12  |
| 8  | 10320940  |    | 0.12  |
| 9  | 5328258   |    | 0.13  |
| 10 | 123631    |    | 0.15  |
| 11 | 10528818  |   | 0.16  |
| 12 | 135402838 |  | 0.17  |
| 13 | 5328221   |  | 0.174 |
| 14 | 5328352   |  | 0.18  |
| 15 | 5328373   |  | 0.19  |
| 16 | 5280961   |  | 0.2   |

|    |         |                                                                                   |       |
|----|---------|-----------------------------------------------------------------------------------|-------|
| 17 | 5328202 | 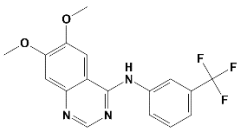 | 0.245 |
| 18 | 5328342 |  | 0.25  |
| 19 | 5328409 |  | 0.27  |
| 20 | 5328233 |  | 0.29  |
